# Supplementary material for: Phenology, Seasonal Abundance, and Host-Plant Association of Spittlebugs (Hemiptera: Aphrophoridae) in Vineyards of Northwestern Italy
Source: MDPI journal article supplement (doi:10.3390/insects12111012), 2021-11-09
Supplement: s1 [file s1]

**Table S1.** Dates of first, last and peak occurrences of the five nymphal instars and adults spittlebugs (peak dates = max no. of nymphs sampled)

|      |     | <i>Philaenus spumarius</i> |         |        | <i>Neophilaenus campestris</i> |        |        | <i>Aphrophora alni</i> |         |        |
|------|-----|----------------------------|---------|--------|--------------------------------|--------|--------|------------------------|---------|--------|
|      |     | first                      | peak    | last   | first                          | peak   | last   | first                  | peak    | last   |
| 2016 | 1st | 23-Mar                     | 23-Mar  | 23-Mar | —                              | —      | —      | —                      | —       | —      |
|      | 2nd | 23-Mar                     | 23-Mar  | 20-Apr | 23-Mar                         | 31-Mar | 27-Apr | —                      | —       | —      |
|      | 3rd | 23-Mar                     | 12-Apr  | 05-May | 23-Mar                         | 12-Apr | 05-May | —                      | —       | —      |
|      | 4th | 31-Mar                     | 12-Apr  | 05-May | 12-Apr                         | 27-Apr | 05-May | 27-Apr                 | 27-Apr  | 05-May |
|      | 5th | 12-Apr                     | 05-May  | 05-May | 12-Apr                         | 27-Apr | 05-May | 27-Apr                 | 05-May  | 05-May |
|      | Ad  | 27-Apr                     | 27-Sept | 16-Dec | 27-Apr                         | 24-May | 16-Dec | 24-May                 | 01-Sept | 17-Oct |
| 2017 | 1st | 17-Mar                     | 17-Mar  | 12-Apr | 17-Mar                         | 17-Mar | 12-Apr | 27-Mar                 | 27-Mar  | 27-Mar |
|      | 2nd | 17-Mar                     | 27-Mar  | 02-May | 17-Mar                         | 12-Apr | 12-Apr | 27-Mar                 | 12-Apr  | 02-May |
|      | 3rd | 27-Mar                     | 12-Apr  | 02-May | 12-Apr                         | 12-Apr | 12-Apr | 12-Apr                 | 02-May  | 02-May |
|      | 4th | 12-Apr                     | 02-May  | 10-May | 12-Apr                         | 12-Apr | 10-May | 02-May                 | 02-May  | 02-May |
|      | 5th | 12-Apr                     | 10-May  | 10-May | 02-May                         | 02-May | 02-May | 10-May                 | 10-May  | 22-May |
|      | Ad  | 02-May                     | 30-May  | 22-Nov | 10-May                         | 19-Oct | 22-Nov | 22-May                 | 30-May  | 19-Oct |

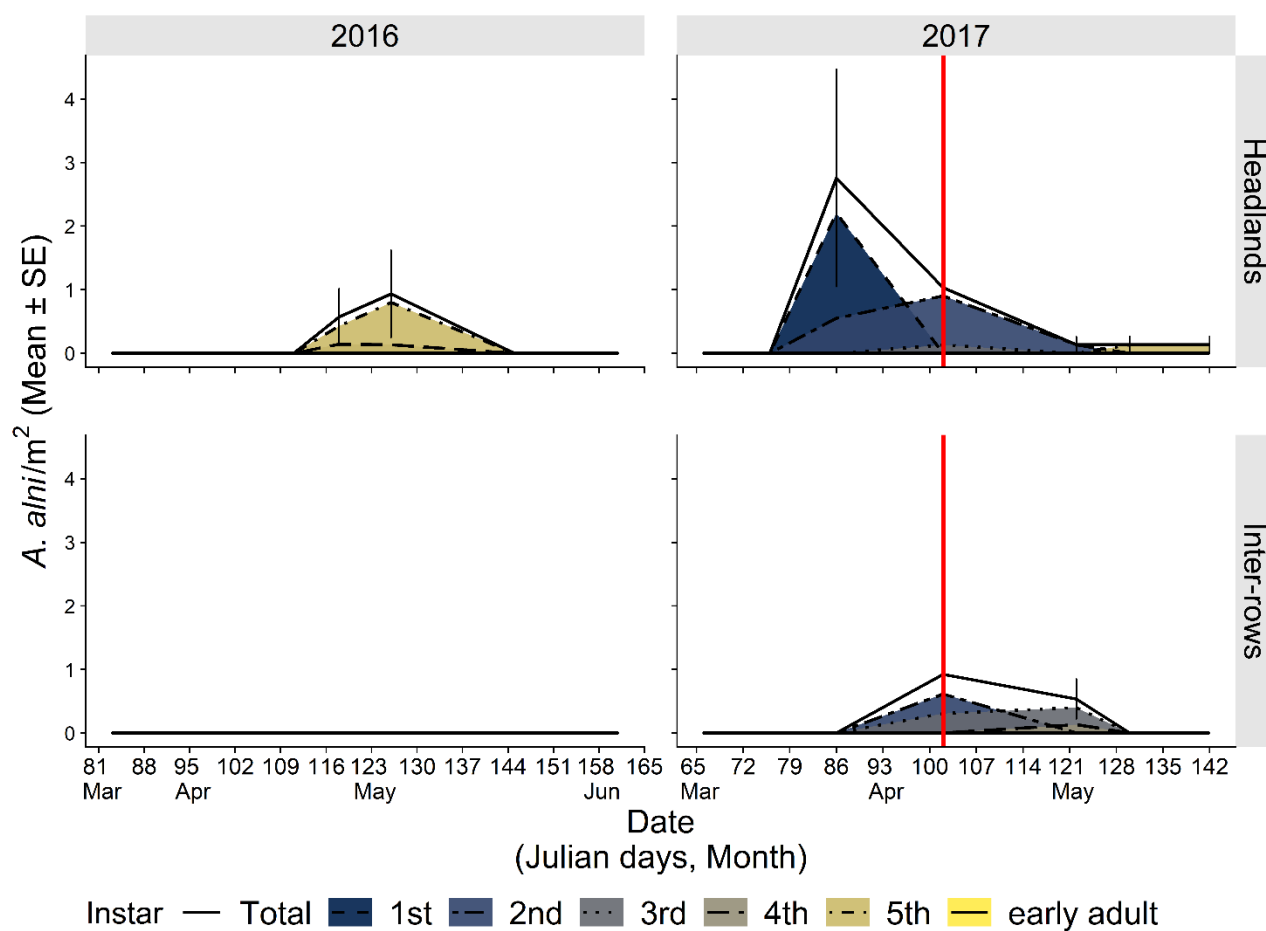

**Figure S2.** Life stage structure of the preimaginal populations of *Aphrophora alni* in vineyard inter-rows and headlands. The area curves of each nymphal instar, the total nymphs, and the newly emerged adults are based on the mean densities, as estimated by quadrat sampling on each sampling date. Red vertical lines represent the date of mowing treatment.

**Table S3.** Absolute (number) and relative (percentage) distributions of *Philaenus spumarius* nymphs according to plant genera on which they were found in an organic vineyard in Asti (North Western Italy) during 2016-2017 surveys. Plant genera are arranged in descending order of *Philaenus spumarius* nymphs observed on them.

| Host plant taxon       |                 | No. nymphs sampled |      |       | % on total nymphs |
|------------------------|-----------------|--------------------|------|-------|-------------------|
| Genus                  | Family          | 2016               | 2017 | Total |                   |
| <i>Plantago</i>        | Plantaginaceae  | 541                | 429  | 970   | 15.209            |
| <i>Cerastium</i>       | Caryophyllaceae | 333                | 354  | 687   | 10.771            |
| <i>Trifolium</i>       | Fabaceae        | 474                | 137  | 611   | 9.580             |
| <i>Taraxacum</i>       | Asteraceae      | 220                | 199  | 419   | 6.569             |
| <i>Rumex</i>           | Polygonaceae    | 270                | 21   | 291   | 4.563             |
| <i>Medicago</i>        | Fabaceae        | 274                | 14   | 288   | 4.516             |
| <i>Erigeron</i>        | Asteraceae      | 175                | 86   | 261   | 4.092             |
| <i>Veronica</i>        | Plantaginaceae  | 130                | 130  | 260   | 4.077             |
| <i>Convolvulus</i>     | Convolvulaceae  | 245                | 9    | 254   | 3.982             |
| <i>Hypochaeris</i>     | Asteraceae      | 121                | 122  | 243   | 3.810             |
| <i>Picris</i>          | Asteraceae      | 219                | 15   | 234   | 3.669             |
| <i>Geranium</i>        | Geraniaceae     | 132                | 66   | 198   | 3.104             |
| <i>Poa</i>             | Poaceae         | 174                | —    | 174   | 2.728             |
| <i>Crepis</i>          | Asteraceae      | 74                 | 68   | 142   | 2.226             |
| <i>Sonchus</i>         | Asteraceae      | 121                | —    | 121   | 1.897             |
| <i>Lotus</i>           | Fabaceae        | 39                 | 64   | 103   | 1.615             |
| <i>Bellis</i>          | Asteraceae      | 43                 | 42   | 85    | 1.333             |
| <i>Bromus</i>          | Poaceae         | 73                 | —    | 73    | 1.145             |
| <i>Avena</i>           | Poaceae         | 68                 | 1    | 69    | 1.082             |
| <i>Salvia</i>          | Lamiaceae       | 51                 | 11   | 62    | 0.972             |
| <i>Solidago</i>        | Asteraceae      | 52                 | 7    | 59    | 0.925             |
| <i>Poaceae</i> spp.    | Poaceae         | 13                 | 42   | 55    | 0.862             |
| <i>Asteraceae</i> spp. | Asteraceae      | 12                 | 33   | 45    | 0.706             |
| <i>Artemisia</i>       | Asteraceae      | —                  | 42   | 42    | 0.659             |
| <i>Stellaria</i>       | Caryophyllaceae | 1                  | 40   | 41    | 0.643             |
| <i>Galium</i>          | Rubiaceae       | 27                 | 10   | 37    | 0.580             |
| <i>Vicia</i>           | Fabaceae        | 35                 | —    | 35    | 0.549             |
| <i>Potentilla</i>      | Rosaceae        | 18                 | 17   | 35    | 0.549             |
| <i>Erodium</i>         | Geraniaceae     | 29                 | 3    | 32    | 0.502             |
| <i>Rapistrum</i>       | Brassicaceae    | —                  | 31   | 31    | 0.486             |
| <i>Ranunculus</i>      | Ranunculaceae   | 31                 | —    | 31    | 0.486             |
| <i>Daucus</i>          | Apiaceae        | 27                 | 1    | 28    | 0.439             |
| <i>Centaurea</i>       | Asteraceae      | 26                 | —    | 26    | 0.408             |
| <i>Fabaceae</i> spp.   | Fabaceae        | 26                 | —    | 26    | 0.408             |
| <i>Calepina</i>        | Brassicaceae    | 25                 | —    | 25    | 0.392             |
| <i>Myosotis</i>        | Boraginaceae    | 9                  | 15   | 24    | 0.376             |

|                             |                 |    |    |    |       |
|-----------------------------|-----------------|----|----|----|-------|
| <i>Caryophyllaceae</i> spp. | Caryophyllaceae | —  | 24 | 24 | 0.376 |
| <i>Sanguisorba</i>          | Rosaceae        | 5  | 17 | 22 | 0.345 |
| <i>Cirsium</i>              | Asteraceae      | 17 | —  | 17 | 0.267 |
| <i>Papaveraceae</i>         | Papaveraceae    | —  | 14 | 14 | 0.220 |
| <i>Euphorbia</i>            | Euphorbiaceae   | —  | 13 | 13 | 0.204 |
| <i>Cichorium</i>            | Asteraceae      | —  | 12 | 12 | 0.188 |
| <i>Leucanthemum</i>         | Asteraceae      | 10 | 1  | 11 | 0.172 |
| <i>Brassicaceae</i>         | Brassicaceae    |    | 10 | 10 | 0.157 |
| <i>Sorghum</i>              | Poaceae         | 10 | —  | 10 | 0.157 |
| <i>Hieracium</i>            | Asteraceae      | 6  | 1  | 7  | 0.110 |
| <i>Lactuca</i>              | Asteraceae      | 7  | —  | 7  | 0.110 |
| <i>Mentha</i>               | Lamiaceae       | 6  | —  | 6  | 0.094 |
| <i>Ranunculus</i>           | Ranunculaceae   |    | 6  | 6  | 0.094 |
| <i>Achillea</i>             | Asteraceae      | 2  | 3  | 5  | 0.078 |
| <i>Ornithogalum</i>         | Asparagaceae    | 4  |    | 4  | 0.063 |
| <i>Thesium</i>              | Thesiaceae      | —  | 4  | 4  | 0.063 |
| <i>Muscari</i>              | Asparagaceae    | 3  | —  | 3  | 0.047 |
| <i>Ambrosia</i>             | Asteraceae      | 3  | —  | 3  | 0.047 |
| <i>Senecio</i>              | Asteraceae      | —  | 3  | 3  | 0.047 |
| <i>Capsella</i>             | Brassicaceae    | —  | 3  | 3  | 0.047 |
| <i>Liliaceae</i>            | Liliaceae       | —  | 3  | 3  | 0.047 |
| <i>Leontodon</i>            | Asteraceae      | 1  | 1  | 2  | 0.031 |
| <i>Echium</i>               | Boraginaceae    | 2  | —  | 2  | 0.031 |
| <i>Coronilla</i>            | Fabaceae        | 1  | 1  | 2  | 0.031 |
| <i>Hordeum</i>              | Poaceae         | 2  | —  | 2  | 0.031 |
| <i>Lolium</i>               | Poaceae         | 2  | —  | 2  | 0.031 |
| <i>Calendula</i>            | Asteraceae      | 1  | —  | 1  | 0.016 |
| <i>Dianthus</i>             | Caryophyllaceae | 1  | —  | 1  | 0.016 |
| <i>Convolvulus</i>          | Convolvulaceae  | 1  | —  | 1  | 0.016 |
| <i>Euphorbiaceae</i> spp.   | Euphorbiaceae   | 1  | —  | 1  | 0.016 |
| <i>Lathyrus</i>             | Fabaceae        | 1  | —  | 1  | 0.016 |
| <i>Carex</i>                | Poaceae         | 1  | —  | 1  | 0.016 |
| <i>Alchemilla</i>           | Rosaceae        | 1  | —  | 1  | 0.016 |
| <i>Fragaria</i>             | Rosaceae        | 1  | —  | 1  | 0.016 |
| <i>Populus</i>              | Salicaceae      | 1  | —  | 1  | 0.016 |
| <i>Solanum</i>              | Solanaceae      | —  | 1  | 1  | 0.016 |
| Not on plant                |                 | 20 | 1  | 20 | 0.329 |
| Unknown plant taxa          |                 | 11 | 14 | 34 | 0.547 |

---

**Table S4.** Output of the generalized linear mixed models (GLMM) for the effects height of herbaceous cover (*height\_herb\_cover*), percentage of herbaceous cover (*%\_herb\_cover*), and vineyard zone on density of *Philaenus spumarius* nymphs (#/m<sup>2</sup>) during peak period of 2016 survey (2016-03-20 – 2016-05-10).

| Effects                  | Beta | 95% CI <sup>1</sup> | p-value          |
|--------------------------|------|---------------------|------------------|
| Fixed                    |      |                     |                  |
| <b>Intercept</b>         | 5.7  | 5.5, 6.0            | <b>&lt;0.001</b> |
| <b>height_herb_cover</b> | 0.16 | 0.04, 0.28          | <b>0.011</b>     |
| <b>%_herb_cover</b>      | 0.06 | -0.03, 0.16         | 0.18             |
| <b>Zone</b>              |      |                     | 0.057            |
| <i>Inter-rows</i>        | —    | —                   |                  |
| <i>Headlands</i>         | 0.18 | -0.01, 0.37         |                  |
| Random                   |      |                     |                  |
| Date SD_(Intercept)      | 0.19 |                     |                  |

<sup>1</sup>CI = Confidence Interval

**Table S5.** Output of the linear mixed models (LMM) for the effects height of herbaceous cover (*height\_herb\_cover*), percentage of herbaceous cover (*%\_herb\_cover*), and vineyard zone on density of *Neophilaenus campestris* nymphs (#/m<sup>2</sup>) during peak period of 2016 survey (2016-03-20 – 2016-05-10).

| Effects                                 | Beta  | 95% CI <sup>1</sup> | p-value          |
|-----------------------------------------|-------|---------------------|------------------|
| Fixed                                   |       |                     |                  |
| <b>Intercept</b>                        | 5.0   | 4.6, 5.4            | <b>&lt;0.001</b> |
| <b>height_herb_cover</b>                | -0.16 | -0.40, 0.08         | 0.18             |
| <b>%_herb_cover</b>                     | 0.05  | -0.21, 0.31         | 0.69             |
| <b>Zone</b>                             |       |                     | <b>&lt;0.001</b> |
| <i>Inter-rows</i>                       | —     | —                   |                  |
| <i>Headlands</i>                        | -0.67 | -1.0, -0.31         |                  |
| <b>height_herb_cover * %_herb_cover</b> | 0.10  | -0.09, 0.28         | 0.30             |
| <b>height_herb_cover * Zone</b>         |       |                     | <b>&lt;0.001</b> |
| <i>height_herb_cover * Headlands</i>    | -0.71 | -1.1, -0.32         |                  |
| <b>%_herb_cover * Zone</b>              |       |                     | <b>0.018</b>     |
| <i>%_herb_cover * Headlands</i>         | 0.44  | 0.08, 0.80          |                  |
| Random                                  |       |                     |                  |
| Date SD (Intercept)                     | 0.35  |                     |                  |
| Residual SD Observation                 | 1.1   |                     |                  |

<sup>1</sup>CI = Confidence Interval

**Table S6.** Output of the binomial generalized linear mixed models (GLMM) for the effects Season, Vegetation component, and Year on sex ratio of *P. spumarius* adults.

| Effects                              | log(OR) <sup>1</sup> | 95% CI <sup>1</sup> | p-value          |
|--------------------------------------|----------------------|---------------------|------------------|
| <b>(Intercept)</b>                   | -0.39                | -0.80, 0.02         | 0.065            |
| <b>Season</b>                        |                      |                     | <b>&lt;0.001</b> |
| <i>Apr-Jun</i>                       | —                    | —                   |                  |
| <i>Jul-Sept</i>                      | -0.42                | -1.0, 0.12          |                  |
| <i>Oct-Dec</i>                       | -0.60                | -2.1, 0.86          |                  |
| <b>Vegetation_component</b>          |                      |                     | 0.61             |
| <i>Grapevine</i>                     | —                    | —                   |                  |
| <i>Herbaceous</i>                    | 0.09                 | -0.37, 0.54         |                  |
| <i>Shrubs-Trees</i>                  | 0.16                 | -0.28, 0.60         |                  |
| <b>Year</b>                          |                      |                     | <b>0.010</b>     |
| <i>2016</i>                          | —                    | —                   |                  |
| <i>2017</i>                          | 0.09                 | -0.46, 0.65         |                  |
| <b>Season * Vegetation_component</b> |                      |                     | 0.80             |
| <i>Jul-Sept * Herbaceous</i>         | 0.04                 | -0.52, 0.60         |                  |
| <i>Oct-Dec * Herbaceous</i>          | -0.30                | -1.7, 1.1           |                  |
| <i>Jul-Sept * Shrubs-Trees</i>       | 0.21                 | -0.35, 0.76         |                  |
| <i>Oct-Dec * Shrubs-Trees</i>        | 0.47                 | -1.8, 2.8           |                  |
| <b>Season * Year</b>                 |                      |                     | 0.19             |
| <i>Jul-Sept * 2017</i>               | 0.38                 | -0.04, 0.80         |                  |
| <i>Oct-Dec * 2017</i>                | 0.13                 | -0.51, 0.77         |                  |
| <b>Vegetation_component * Year</b>   |                      |                     | 0.077            |
| <i>Herbaceous * 2017</i>             | 0.10                 | -0.46, 0.65         |                  |
| <i>Shrubs-Trees * 2017</i>           | -0.32                | -0.89, 0.25         |                  |
| <b>Date SD (Intercept)</b>           | 0.14                 |                     |                  |

<sup>1</sup>OR = Odds Ratio, CI = Confidence Interval

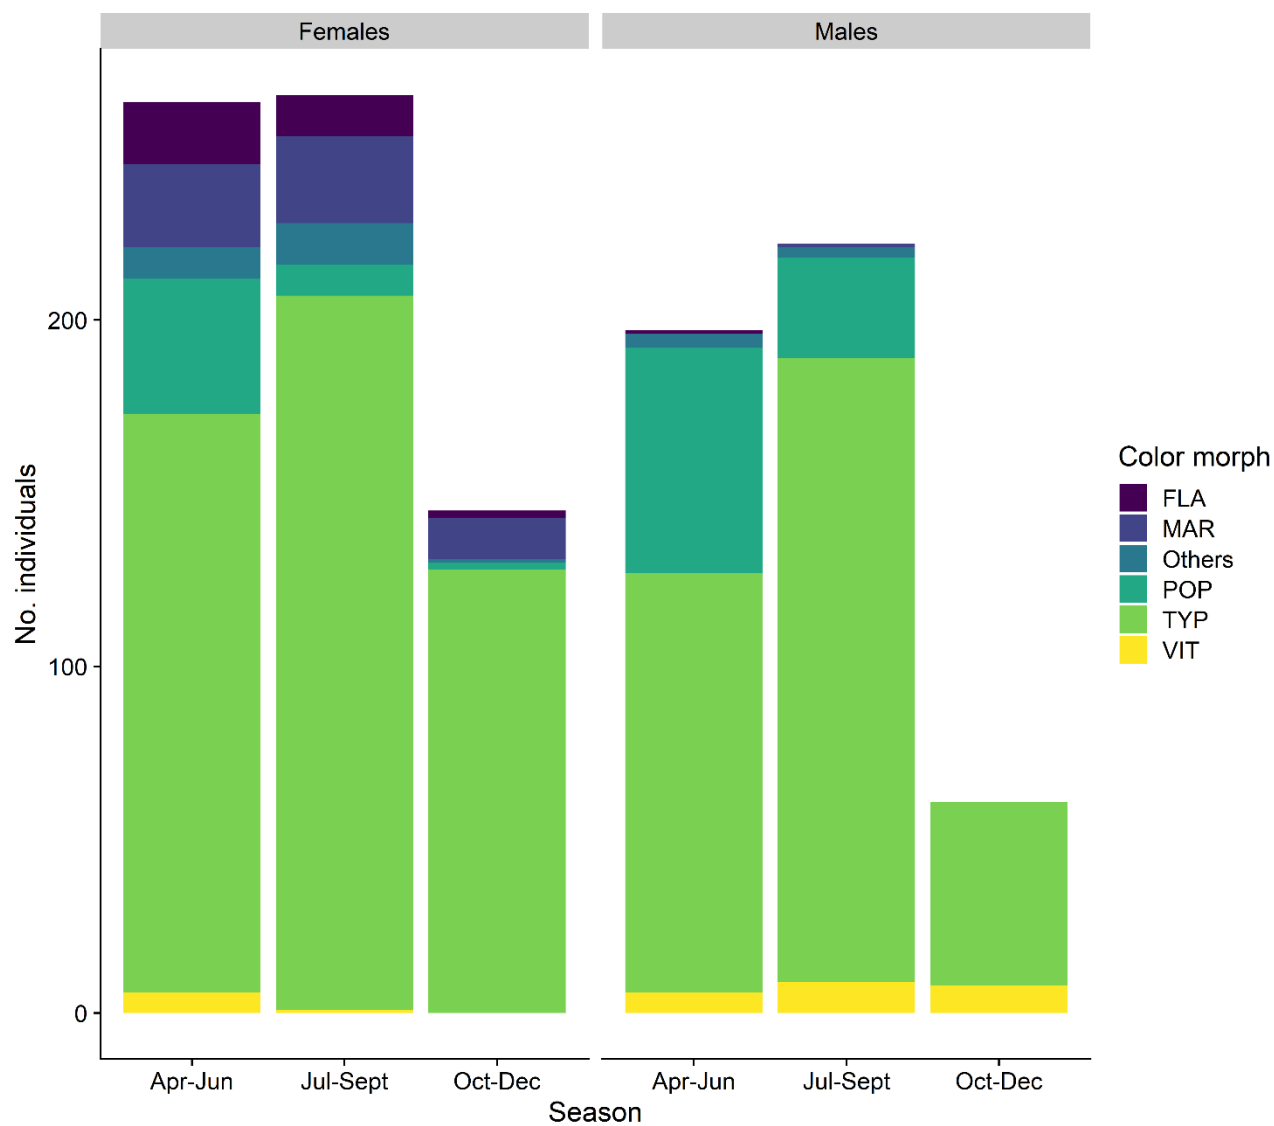

**Figure S7.** Prevalence of principal color morphs of *Philaenus spumarius* adults in the Asti vineyard during 2016-2017 surveys. Data aggregated per sex and sampling season.



**Table S8.** Output of the negative binomial generalized linear models (GLM) for the effects Season, Sex, and Vegetation component on colour morphs frequency among *P. spumarius* adults during 2017 survey.

| Effects                                    | Beta  | 95% CI <sup>1</sup> | p-value |
|--------------------------------------------|-------|---------------------|---------|
| <b>(Intercept)</b>                         | 0.14  | -1.8, 2.8           | 0.90    |
| <b>Colour_morph * Season</b>               |       |                     | 0.88    |
| <i>MAR * Jul-Sept</i>                      | 0.76  | -2.5, 4.2           |         |
| <i>Others * Jul-Sept</i>                   | 1.0   | -2.0, 4.1           |         |
| <i>POP * Jul-Sept</i>                      | -0.15 | -2.9, 2.8           |         |
| <i>TYP * Jul-Sept</i>                      | 1.1   | -1.7, 4.0           |         |
| <i>VIT * Jul-Sept</i>                      | 0.34  | -2.8, 3.7           |         |
| <i>MAR * Oct-Dec</i>                       | 1.4   | -2.6, 5.7           |         |
| <i>Others * Oct-Dec</i>                    | 0.35  | -3.9, 4.7           |         |
| <i>POP * Oct-Dec</i>                       | -1.1  | -4.8, 3.0           |         |
| <i>TYP * Oct-Dec</i>                       | 1.6   | -1.8, 5.6           |         |
| <i>VIT * Oct-Dec</i>                       | 1.5   | -2.3, 5.7           |         |
| <b>Colour_morph * Sex</b>                  |       |                     | <0.001  |
| <i>MAR * Male</i>                          | -0.50 | -4.9, 4.0           |         |
| <i>Others * Male</i>                       | 3.2   | -0.01, 7.3          |         |
| <i>POP * Male</i>                          | 4.3   | 1.3, 8.4            |         |
| <i>TYP * Male</i>                          | 3.5   | 0.62, 7.5           |         |
| <i>VIT * Male</i>                          | 5.7   | 2.4, 9.9            |         |
| <b>Colour_morph * Vegetation_component</b> |       |                     | >0.99   |
| <i>MAR * Herbaceous</i>                    | 1.0   | -3.2, 5.2           |         |
| <i>Others * Herbaceous</i>                 | -0.54 | -4.6, 3.3           |         |
| <i>POP * Herbaceous</i>                    | -0.65 | -4.5, 2.7           |         |
| <i>TYP * Herbaceous</i>                    | 0.30  | -3.4, 3.5           |         |
| <i>VIT * Herbaceous</i>                    | 1.2   | -3.0, 5.4           |         |
| <i>MAR * Shrubs-Trees</i>                  | 0.71  | -3.0, 4.5           |         |
| <i>Others * Shrubs-Trees</i>               | 0.28  | -3.3, 3.9           |         |
| <i>POP * Shrubs-Trees</i>                  | -0.43 | -3.7, 2.8           |         |
| <i>TYP * Shrubs-Trees</i>                  | -0.05 | -3.2, 3.0           |         |
| <i>VIT * Shrubs-Trees</i>                  | 0.67  | -3.1, 4.9           |         |

<sup>1</sup>CI = Confidence Interval
